# Supplementary material
Source: PubMed Central journal article supplement (PMC2630355)
Supplement: supp_180_3_291_v2_1.pdf [file supp_180_3_291_v2_1.pdf]

**Appendix 1** (as supplied by the authors): A proposed reporting checklist for authors, editors, and reviewers of meta-analyses of observational studies (MOOSE checklist)

| Descriptor                                                                                                                                                                                                                                                                                                                                                                                                                                                                                                                                                                                                                                                                                                                                                                                                                                                                                                                                                                                                                                                                                     | Reported? | Paragraph                                                   |
|------------------------------------------------------------------------------------------------------------------------------------------------------------------------------------------------------------------------------------------------------------------------------------------------------------------------------------------------------------------------------------------------------------------------------------------------------------------------------------------------------------------------------------------------------------------------------------------------------------------------------------------------------------------------------------------------------------------------------------------------------------------------------------------------------------------------------------------------------------------------------------------------------------------------------------------------------------------------------------------------------------------------------------------------------------------------------------------------|-----------|-------------------------------------------------------------|
| <p>Reporting of background should include</p> <ul style="list-style-type: none"> <li>Problem definition</li> <li>Hypothesis statement</li> <li>Description of study outcome(s)</li> <li>Type of exposure or intervention used</li> <li>Type of study designs used</li> <li>Study population</li> </ul>                                                                                                                                                                                                                                                                                                                                                                                                                                                                                                                                                                                                                                                                                                                                                                                         | Y         | Abstract and introduction                                   |
| <p>Reporting of search strategy should include</p> <ul style="list-style-type: none"> <li>Qualifications of searchers (e.g., librarians and investigators)</li> <li>Search strategy, including time period included in the synthesis and keywords</li> <li>Effort to include all available studies, including contact with authors</li> <li>Databases and registries searched</li> <li>Search software used, name and version, including special features used (eg, explosion)</li> <li>Use of hand searching (e.g., reference lists of obtained articles)</li> <li>List of citations located and those excluded, including justification</li> <li>Method of addressing articles published in languages other than English</li> <li>Method of handling abstracts and unpublished studies</li> <li>Description of any contact with authors</li> </ul>                                                                                                                                                                                                                                           | Y         | Study selection and data collection                         |
| <p>Reporting of methods should include</p> <ul style="list-style-type: none"> <li>Description of relevance or appropriateness of studies assembled for assessing the hypothesis to be tested</li> <li>Rationale for the selection and coding of data (e.g., sound clinical principles or convenience)</li> <li>Documentation of how data were classified and coded (e.g., multiple raters, blinding, and interrater reliability)</li> <li>Assessment of confounding (e.g., comparability of cases and controls in studies where appropriate)</li> <li>Assessment of study quality, including blinding of quality assessors; stratification or regression on possible predictors of study results</li> <li>Assessment of heterogeneity</li> <li>Description of statistical methods (e.g., complete description of fixed or random effects models, justification of whether the chosen models account for predictors of study results, dose-response models, or cumulative meta-analysis) in sufficient detail to be replicated</li> <li>Provision of appropriate tables and graphics</li> </ul> | Y         | Data synthesis and Sensitivity analyses and meta-regression |
| <p>Reporting of results should include</p> <ul style="list-style-type: none"> <li>Graphic summarizing individual study estimates and overall estimate</li> <li>Table giving descriptive information for each study included</li> <li>Results of sensitivity testing (e.g., subgroup analysis)</li> <li>Indication of statistical uncertainty of findings</li> </ul>                                                                                                                                                                                                                                                                                                                                                                                                                                                                                                                                                                                                                                                                                                                            | Y         | Results and Tables and Figures                              |
| <p>Reporting of discussion should include</p> <ul style="list-style-type: none"> <li>Quantitative assessment of bias (e.g., publication bias)</li> <li>Justification for exclusion (e.g., exclusion of non-English-language citations)</li> <li>Assessment of quality of included studies</li> </ul>                                                                                                                                                                                                                                                                                                                                                                                                                                                                                                                                                                                                                                                                                                                                                                                           | Y         | Discussion                                                  |
| <p>Reporting of conclusions should include</p> <ul style="list-style-type: none"> <li>Consideration of alternative explanations for observed results</li> <li>Generalization of the conclusions (i.e., appropriate for the data presented and within the domain of the literature review)</li> <li>Guidelines for future research</li> </ul> <p>Disclosure of funding source</p>                                                                                                                                                                                                                                                                                                                                                                                                                                                                                                                                                                                                                                                                                                               | Y         | Conclusion                                                  |
|                                                                                                                                                                                                                                                                                                                                                                                                                                                                                                                                                                                                                                                                                                                                                                                                                                                                                                                                                                                                                                                                                                |           | Title page                                                  |
