# Supplementary material
Source: PubMed Central journal article supplement (PMC2630355)
Supplement: supp_180_3_291_v2_2.pdf [file supp_180_3_291_v2_2.pdf]

## Appendix 2 (as supplied by the authors): search strategy

### MEDLINE

1. exp Antidepressive Agents/
2. exp Antidepressive Agents, Second-Generation/
3. fluoxetine.mp.
4. sertraline.mp.
5. fluvoxamine.mp.
6. citalopram.mp.
7. escitalopram.mp.
8. paroxetine.mp.
9. or/1-8
10. exp Suicide/
11. exp Suicide, Assisted/
12. exp Suicide, Attempted/
13. or/10-12
14. 9 and 13
15. limit 13 to yr="1990 - 2008"

### EMBASE

- #1 antidepressive AND agents AND [1990-2008]/py
- #2 antidepressive AND agents AND second AND generation AND [1990-2008]/py
- #3 ('paroxetine'/exp OR 'paroxetine') AND [1990-2008]/py
- #4 ('sertraline'/exp OR 'sertraline') AND [1990-2008]/py
- #5 ('escitalopram'/exp OR 'escitalopram') AND [1990-2008]/py
- #6 ('citalopram'/exp OR 'citalopram') AND [1990-2008]/py
- #7 ('fluoxetine'/exp OR 'fluoxetine') AND [1990-2008]/py
- #8 ('fluvoxamine'/exp OR 'fluvoxamine') AND [1990-2008]/py
- #9 ('suicide'/exp OR 'suicide') AND [1990-2008]/py
- #10 #1 OR #2 OR #3 OR #4 OR #5 OR #6 OR #7 OR #8
- #11 #9 AND #10

Appendix to: Barbui C, Esposito E, Cipriani A. Selective serotonin reuptake inhibitors and risk of suicide: a systematic review of observational studies. *CMAJ* 2009;180:291-7.

Copyright © 2008, Canadian Medical Association.
