# Supplementary material
Source: PubMed Central journal article supplement (PMC2630355)
Supplement: supp_180_3_291_v2_3.pdf [file supp_180_3_291_v2_3.pdf]

**Appendix 3** (as supplied by authors): Data Abstraction Form for Systematic Review of SSRIs and Suicide

**Initials**

**ID**

**First author, year**

**Country**

**Population framework**

**Design** (circle appropriate answer)

**Age range**

**Adults**  
**Adolescents**

**Mean duration of follow-up**

**Cases**

No. \_\_\_\_\_

Definition:

**Controls**

No. \_\_\_\_\_

Definition:

**Matching criteria**

**Confounder adjustment**

**Suicide definition**

**Attempted suicide definition**

**Analysis method** (e.g. multivariable Cox regression)

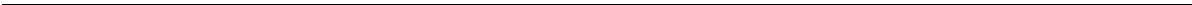

ID

**SSRIs AS A CLASS VERSUS NO USE – COMPLETED AND ATTEMPTED SUICIDE**

Suicide risk – SSRIs versus no use

Measure

OR/RR/HR

Age range

Suicide risk – SSRIs versus no use

Measure

OR/RR/HR

Age range

Suicide risk – SSRIs versus no use

Measure

OR/RR/HR

Age range

Suicide risk – SSRIs versus no use

Measure

OR/RR/HR

Age range

Suicide risk – SSRIs versus no use

Measure

OR/RR/HR

Age range

Attempted suicide risk – SSRIs versus no use

Measure

OR/RR/HR

Age range

Attempted suicide risk – SSRIs versus no use

Measure

OR/RR/HR

Age range

Attempted suicide risk – SSRIs versus no use

Measure

OR/RR/HR

Age range

Attempted suicide risk – SSRIs versus no use

Measure

OR/RR/HR

Age range

Attempted suicide risk – SSRIs versus no use

Measure

OR/RR/HR

Age range

Notes/comments

**INDIVIDUAL ANTIDEPRESSANTS VERSUS NO USE - COMPLETED SUICIDE**

|                                                    |  |         |          |           |  |
|----------------------------------------------------|--|---------|----------|-----------|--|
| Suicide risk –<br>sertraline versus no use         |  | Measure | OR/RR/HR | Age range |  |
| Suicide risk –<br>paroxetine versus no use         |  | Measure | OR/RR/HR | Age range |  |
| Suicide risk –<br>fluoxetine versus no use         |  | Measure | OR/RR/HR | Age range |  |
| Suicide risk –<br>fluvoxamine versus no use        |  | Measure | OR/RR/HR | Age range |  |
| Suicide risk –<br>venlafaxine versus no use        |  | Measure | OR/RR/HR | Age range |  |
| Suicide risk –<br>other AD: _____<br>versus no use |  | Measure | OR/RR/HR | Age range |  |
| Suicide risk –<br>other AD: _____<br>versus no use |  | Measure | OR/RR/HR | Age range |  |

|                                                    |  |         |          |           |  |
|----------------------------------------------------|--|---------|----------|-----------|--|
| Suicide risk –<br>sertraline versus no use         |  | Measure | OR/RR/HR | Age range |  |
| Suicide risk –<br>paroxetine versus no use         |  | Measure | OR/RR/HR | Age range |  |
| Suicide risk –<br>fluoxetine versus no use         |  | Measure | OR/RR/HR | Age range |  |
| Suicide risk –<br>fluvoxamine versus no use        |  | Measure | OR/RR/HR | Age range |  |
| Suicide risk –<br>venlafaxine versus no use        |  | Measure | OR/RR/HR | Age range |  |
| Suicide risk –<br>other AD: _____<br>versus no use |  | Measure | OR/RR/HR | Age range |  |
| Suicide risk –<br>other AD: _____<br>versus no use |  | Measure | OR/RR/HR | Age range |  |

**INDIVIDUAL ANTIDEPRESSANTS VERSUS NO USE - ATTEMPTED SUICIDE**

|                                                              |                      |         |          |           |                      |
|--------------------------------------------------------------|----------------------|---------|----------|-----------|----------------------|
| Attempted suicide risk –<br>sertraline versus no use         | <input type="text"/> | Measure | OR/RR/HR | Age range | <input type="text"/> |
| Attempted suicide risk –<br>paroxetine versus no use         | <input type="text"/> | Measure | OR/RR/HR | Age range | <input type="text"/> |
| Attempted suicide risk –<br>fluoxetine versus no use         | <input type="text"/> | Measure | OR/RR/HR | Age range | <input type="text"/> |
| Attempted suicide risk –<br>fluvoxamine versus no use        | <input type="text"/> | Measure | OR/RR/HR | Age range | <input type="text"/> |
| Attempted suicide risk –<br>venlafaxine versus no use        | <input type="text"/> | Measure | OR/RR/HR | Age range | <input type="text"/> |
| Attempted suicide risk –<br>other AD: _____<br>versus no use | <input type="text"/> | Measure | OR/RR/HR | Age range | <input type="text"/> |
| Attempted suicide risk –<br>other AD: _____<br>versus no use | <input type="text"/> | Measure | OR/RR/HR | Age range | <input type="text"/> |
| Attempted suicide risk –<br>sertraline versus no use         | <input type="text"/> | Measure | OR/RR/HR | Age range | <input type="text"/> |
| Attempted suicide risk –<br>paroxetine versus no use         | <input type="text"/> | Measure | OR/RR/HR | Age range | <input type="text"/> |
| Attempted suicide risk –<br>fluoxetine versus no use         | <input type="text"/> | Measure | OR/RR/HR | Age range | <input type="text"/> |
| Attempted suicide risk –<br>fluvoxamine versus no use        | <input type="text"/> | Measure | OR/RR/HR | Age range | <input type="text"/> |
| Attempted suicide risk –<br>venlafaxine versus no use        | <input type="text"/> | Measure | OR/RR/HR | Age range | <input type="text"/> |
| Attempted suicide risk –<br>other AD: _____<br>versus no use | <input type="text"/> | Measure | OR/RR/HR | Age range | <input type="text"/> |
| Attempted suicide risk –<br>other AD: _____<br>versus no use | <input type="text"/> | Measure | OR/RR/HR | Age range | <input type="text"/> |
