# Supplementary material
Source: PubMed Central journal article supplement (PMC2630355)
Supplement: supp_180_3_291_v2_4.pdf [file supp_180_3_291_v2_4.pdf]

**Appendix 4** (as supplied by the authors): Quality Checklist for Systematic Review of SSRIs and Suicide

Initials

ID

First author, year

|                          |                              |   |
|--------------------------|------------------------------|---|
| <b>Population sample</b> | Defined geographic area      | 2 |
|                          | > Hospital / Medicaid system | 1 |
|                          | Convenience sample           | 0 |
| <b>Study Design</b>      | Cohort                       | 2 |
|                          | Case-control                 | 1 |
| <b>Demographic data</b>  | Complete description         | 1 |
|                          | Inadequate                   | 0 |
| <b>Clinical data</b>     | Complete description         | 1 |
|                          | Partial description          | 0 |
| <b>Outcome data</b>      | Complete description         | 2 |
|                          | Partial description          | 1 |
|                          | Inadequate description       | 0 |
| <b>Matching</b>          | > 3 Factors                  | 2 |
|                          | 1 - 3 Factors                | 1 |
|                          | None                         | 0 |
