# Supplementary material
Source: PubMed Central journal article supplement (PMC2630355)
Supplement: supp_180_3_291_v2_5.pdf [file supp_180_3_291_v2_5.pdf]

**Appendix 5** (as supplied by author): Characteristics of included studies assessing the relationship between SSRI exposure and risk of suicide attempt and completion

| Study name (country) | Study design | Population framework                    | Age range (mean)* | Males % | Group exposed to SSRI                                                                                                   | Control group not exposed to any AD                                                                                   | Adjustment for confounders or matching criteria | Outcome definition                      | Ascertainment of SSRI exposure                                                                   | Quality score |
|----------------------|--------------|-----------------------------------------|-------------------|---------|-------------------------------------------------------------------------------------------------------------------------|-----------------------------------------------------------------------------------------------------------------------|-------------------------------------------------|-----------------------------------------|--------------------------------------------------------------------------------------------------|---------------|
| Gibbons 2007 (USA)   | Cohort       | Veterans health administration database | 18 + (59)         | 92      | New depressive episode and SSRI monotherapy <i>n</i> = 82 828                                                           | New depressive episode and no AD exposure, <i>n</i> = 59 432                                                          | No                                              | Attempted suicide (ICD-9)               | AD exposure defined as prescriptions following new depressive treatment (mean FU 433 d)          | 7             |
| Olfson 2006 (USA)    | Case-control | Medicaid database                       | 6-64              | 61      | Suicide attempt, <i>n</i> = 521a/263c, and completion, <i>n</i> = 86a/8c, preceded by hospital admission for depression | No suicide attempt, <i>n</i> = 2394a/1241c, or completion, <i>n</i> = 396a/39c, and hospital admission for depression | > 3                                             | Attempted and completed suicide (ICD-9) | AD exposure defined as prescriptions in which the supplied d included or exceeded the event date | 8             |
| Olfson 2006 (USA)    | Case-control | Medicaid database                       | 6-64              | 26      | New depressive episode and suicide attempt during the subsequent 120 d, <i>n</i> = 185a/51c                             | New depressive episode and no suicide attempt during the subsequent 120 d, <i>n</i> = 893a/239c                       | > 3                                             | Attempted suicide (ICD-9)               | AD exposure defined as prescriptions in which the supplied d included or exceeded the event date | 8             |
| Rahme 2008 (Canada)  | Cohort       | Medicaid database                       | 65 + (75)         | 30      | Patients ≥ 65 with a new SSRI prescription and prior billing for depression and/or anxiety, <i>n</i> = 128 229          | Same cohort during periods of nonexposure to any AD (based on dispensation dates and number of supplied d)            | No                                              | Completed suicide (ICD-9)               | AD exposure defined as prescriptions following initial AD prescription (mean FU unclear)         | 7             |

Continued on next page

**Appendix 5** (as supplied by author): Characteristics of included studies assessing the relationship between SSRI exposure and risk of suicide attempt and completion

| Study name (country)       | Study design | Population framework | Age range (mean)* | Males % | Group exposed to SSRI                                                                                                        | Control group not exposed to any AD                                                                                               | Adjustment for confounders or matching criteria | Outcome definition                       | Ascertainment of SSRI exposure                                                                                 | Quality score |
|----------------------------|--------------|----------------------|-------------------|---------|------------------------------------------------------------------------------------------------------------------------------|-----------------------------------------------------------------------------------------------------------------------------------|-------------------------------------------------|------------------------------------------|----------------------------------------------------------------------------------------------------------------|---------------|
| Sondergaard 2007 (Denmark) | Cohort       | National database    | 10–17             | N/A     | Patients receiving new SSRI treatment during study period, <i>n</i> = 2311                                                   | Random group of patients who did not receive AD treatment, <i>n</i> = 50 000                                                      | > 3                                             | Completed suicide (ICD-9)                | AD exposure defined as prescriptions following initial AD prescription (mean FU unclear)                       | 6             |
| Sondergaard 2007 (Denmark) | Cohort       | National database    | 18 + (56)         | 30      | New diagnosis of depressive episode, <i>n</i> = 31 422, and SSRI exposure                                                    | New diagnosis of depressive episode and no AD exposure, <i>n</i> = 15.8% of cohort                                                | > 3                                             | Completed suicide (ICD-10)               | AD exposure defined as prescriptions following initial AD prescription (mean FU unclear)                       | 7             |
| Tilhonen 2006 (Finland)    | Cohort       | National database    | 10 + (39)         | 48      | Patients without psychosis hospitalized because of suicide attempt, <i>n</i> = 15 390                                        | Same cohort during periods of nonexposure to any AD                                                                               | > 3                                             | Attempted and completed suicide (ICD-10) | AD exposure defined as prescriptions following initial AD prescription (mean FU unclear)                       | 7             |
| Valuck 2004 (USA)          | Cohort       | Medicaid database    | 12–18             | 35      | Patients with a new start of depression treatment and SSRI exposure within 30 d of the index diagnosis date, <i>n</i> = 4595 | Patients with a new start of depression treatment and no SSRI exposure within 30 d of the index diagnosis date, <i>n</i> = 17 313 | > 3                                             | Attempted suicide (ICD-9)                | AD exposure defined as prescriptions following initial AD prescription (mean FU of at least 6 mo, mean 1.36 y) | 7             |

a = attempt; AD = antidepressant; c = completion; SSRI = selective serotonin uptake inhibitor.  
 \*Unless otherwise indicated.
