# Supplementary material
Source: PubMed Central journal article supplement (PMC2630355)
Supplement: supp_180_3_291_v2_6.pdf [file supp_180_3_291_v2_6.pdf]

## Funnel Plot of Standard Error by Log odds ratio

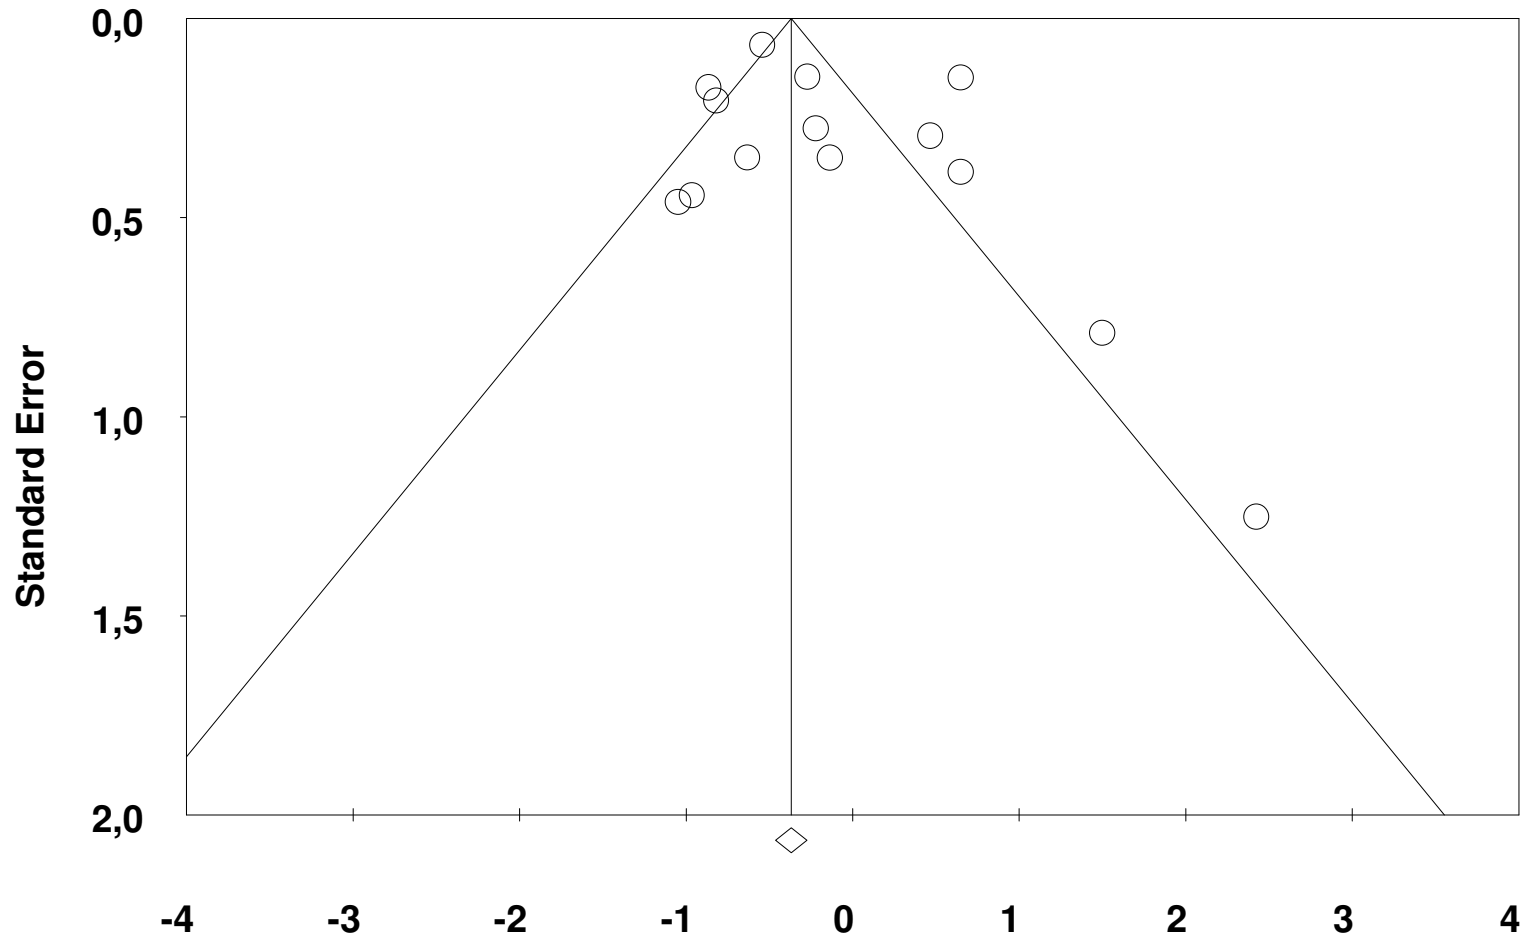

**Appendix 6** (as supplied by authors): Funnel plot investigating the possibility of publication bias. Although visual inspection of graph suggested that small studies failing to show an excess risk associated with SSRIs exposure might be lacking, Egger's regression did not suggest statistically significant asymmetry (intercept 1.36, 95% CI -1.16 to 3.90,  $p = 0.263$ )
