# Supplementary material
Source: PubMed Central journal article supplement (PMC2630355)
Supplement: supp_180_3_291_v2_7.pdf [file supp_180_3_291_v2_7.pdf]

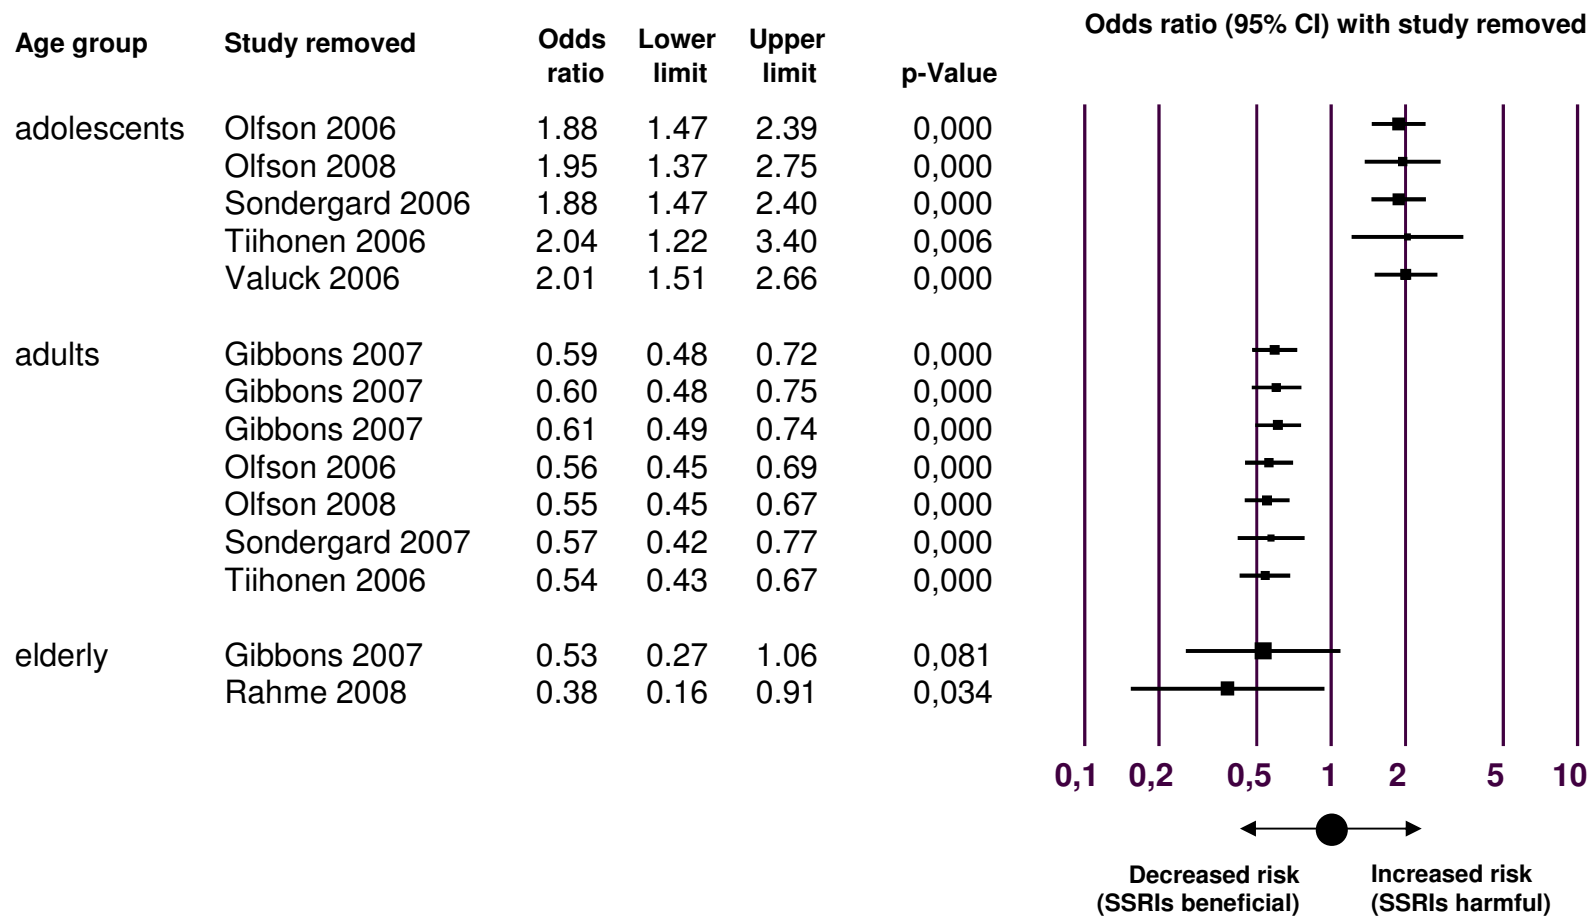

**Appendix 7** (as supplied by the authors): Random-effect meta-analysis influence test that eliminated each of the included studies at a time. The analysis found little of no effect of eliminating each of the studies from the analysis, thus suggesting that individual studies had no excessive influence on the main results.
